# Supplementary material for: Autosomal dominant non-syndromic hearing loss maps to DFNA33 (13q34) and co-segregates with splice and frameshift variants in ATP11A, a phospholipid flippase gene
Source: Springer Nature journal article supplement (doi:10.1007/s00439-022-02444-x), 2022-03-12
Supplement: MOESM1 [file 439_2022_2444_MOESM1_ESM.pdf]

**TITLE: Autosomal dominant non-syndromic hearing loss maps to *DFNA33* (13q34) and co-segregates with splice and frameshift variants in *ATP11A*, a phospholipid flippase gene.**

Justin A. Pater,<sup>1,2</sup> Cindy Penney,<sup>1</sup> Darren D. O’Rielly,<sup>1,3</sup> Anne Griffin,<sup>1</sup> Lara Kamal,<sup>4</sup> Zippora Brownstein,<sup>4</sup> Barbara Vona,<sup>5,6</sup> Chana Vinkler,<sup>4</sup> Mordechai Shohat,<sup>7</sup> Ortal Barel,<sup>7</sup> Curtis R. French,<sup>1</sup> Sushma Singh,<sup>8</sup> Salem Werdyani,<sup>1</sup> Taylor Burt,<sup>1</sup> Nelly Abdelfatah,<sup>1</sup> Jim Houston,<sup>1</sup> Lance P. Doucette,<sup>1</sup> Jessica Squires,<sup>1</sup> Fabian Glaser,<sup>9</sup> Nicole M. Roslin,<sup>10</sup> Daniel Vincent,<sup>11</sup> Pascale Marquis,<sup>12</sup> Geoffrey Woodland,<sup>1</sup> Touati Benoukraf,<sup>1</sup> Alexia Hawkey-Noble,<sup>1</sup> Karen B. Avraham,<sup>4</sup> Susan G. Stanton,<sup>8\*</sup> Terry-Lynn Young<sup>1, 3\*</sup>

<sup>1</sup>Faculty of Medicine, Memorial University, 300 Prince Phillip Drive, St. John’s, NL, Canada.

<sup>2</sup>Dana-Farber Cancer Institute, Harvard Medical School, Boston, MA, USA.

<sup>3</sup>Centre for Translational Genomics, Memorial University, 300 Prince Phillip Dr., St. John’s, NL, Canada.

<sup>4</sup>Department of Human Molecular Genetics and Biochemistry, Faculty of Medicine and Sagol School of Neuroscience, Tel Aviv University, Tel Aviv 6997801, Israel.

<sup>5</sup>Institute of Human Genetics, University Medical Center Göttingen, Göttingen, Germany.

<sup>6</sup>Institute for Auditory Neuroscience and InnerEarLab, University Medical Center Göttingen, Göttingen, Germany.

<sup>7</sup>Bioinformatic Center, Cancer Research Institute, The Wohl Institute for Translational Medicine, Sheba Medical Center, Tel-Hashomer, Israel, and Sackler School of Medicine, Tel Aviv University, Israel.

<sup>8</sup>Communication Sciences and Disorders, Western University, Elborn College, 1201 Western Road, London, Ontario, Canada

<sup>9</sup>The Lorry I. Lokey Center for Life Sciences and Engineering, Technion - Israel Institute of Technology, Haifa, Israel<sup>10</sup>The Centre for Applied Genomics, The Hospital for Sick Children, Peter Gilgan Centre for Research and Learning, 686 Bay Street, Toronto, ON, Canada

<sup>11</sup>Genome Quebec Innovation Centre, McGill University, 740 Dr. Penfield Avenue, Montréal, QC, Canada

<sup>12</sup>Canadian Centre for Computational Genomics, McGill University and Genome Quebec Innovation Center, 740 Dr. Penfield Avenue, Montréal, QC, Canada

\*Co-Senior author

**Corresponding Author:** Terry-Lynn Young, Tel: (709) 864-6512, Mobile: (709) 699-3502, email:

[tlyoung@mun.ca](mailto:tlyoung@mun.ca)

Conservation: 61.5%

```
      1      10      20      30      40      50      60      70      80      90     100 104
|-----|-----|-----|-----|-----|-----|-----|-----|-----|-----|
Human: A G G G T G T G A G C A C A G G C T C C A G T C C A G G C C G C A C A G A G C A G C G A T G G G C C C C T C T G A A G G A C C T C C T A C G G C G G C C A G G C G C A G T T A G C T C C A C G C T A G
Mouse: C A G A G C A C C C G A C T C A A A G C A T T G G C C G A T G C C A C C T C G A A C A G C G C C A G G C C C C T G C T G A A G G A C T T C T T A C C G C A G C C A G A C A T G T C T A G C C C A A C G C T A G
Consensus aa G a G c a c c a a a C a C A A a G C a c c a G c C a G G C C a C a c a G A a C A G C G a c a G G C C C C T c C T G A A G G A C c T c T A C c G c A G C C A G a C a c a g c T A G C c C a A C G C T A G
```

**Figure S1.** Multiple species alignment of human (chr13: 113,534,860-113,534,963, *ATP11A-203*, ENST00000415301, Exon 2: 104bp) and mouse (chr8: 12,863,758-12,863,862, *ATP11A-201*, ENSMUST00000033818, Exon 29: 104bp) using MultAlin (<http://multalin.toulouse.inra.fr/multalin/>)

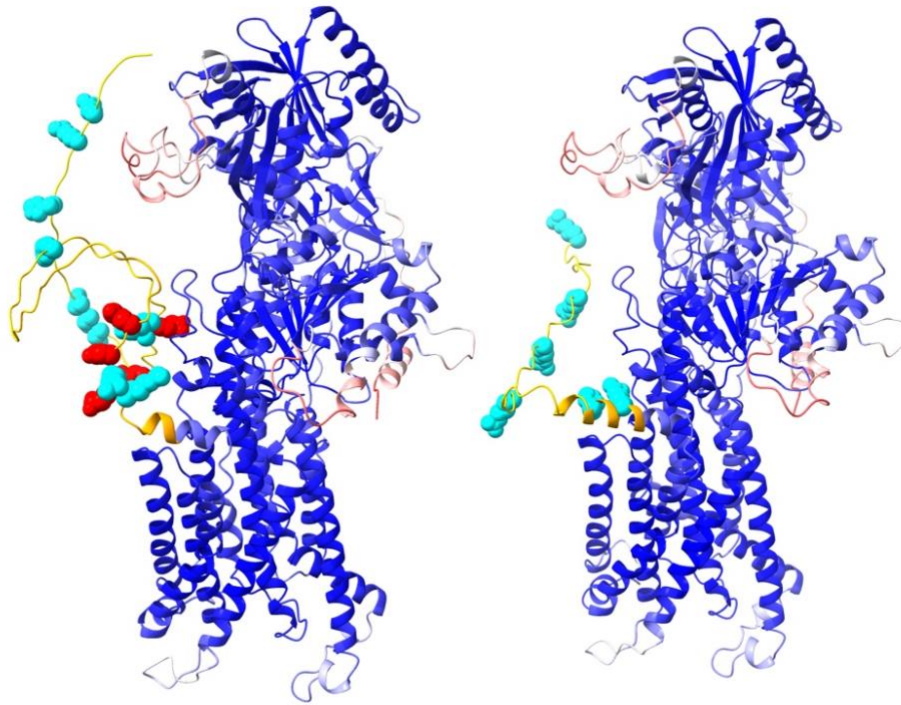

**Figure S2.** AlphaFold 3D structure models for the WT (left panel) and mutant isoforms of ATP11A (right panel). Both structures are colored by AlphaFold confidence measure pLDDT from blue (high accuracy) to red (low accuracy). The C-term region (GLN 1109 to the end) in both structures is colored gold, having a very low pLDDT. C-term Arg, Lys and His are shown in CPK and colored cyan, while Glu and Asp residues are shown in CPK and colored red.

**Table S1. Recurrent Hearing Loss Mutations in Newfoundland**

| Gene           | Accession No. | Variant                                                                         | DFN Locus        | Locus (Cytogenetic) |
|----------------|---------------|---------------------------------------------------------------------------------|------------------|---------------------|
| <i>CLDN14</i>  | NM_144492     | c.488C>T                                                                        | <i>DFNB29</i>    | 21q22.13            |
| <i>TMPRSS3</i> | NM_024022     | c. 207delC<br>c. 268 G>C<br>c. 782+3delGAG<br>c. 757 A>G<br>c. 612-2insTA       | <i>DFNB8/10</i>  | 21q22               |
| <i>WFS1</i>    | NM_006005.3   | c. 2146 G>A<br>c. 1832 A>G                                                      | <i>DFNA6/38</i>  | 4p16.3              |
| <i>PCDH15</i>  | NM_033056     | c. 1583 T>A<br>c. 1590 + 20<br>A>G                                              | <i>DFNB23</i>    | 10p11.2-q21         |
| <i>KCNQ4</i>   | NM_004700     | c. 806delCCT                                                                    | <i>DFNA2A</i>    | 1p34                |
| <i>GJB2</i>    | NM_004004     | c.-23+1G>A<br>c. 35delG<br>c. 101 T>C<br>c. 229 T>C<br>c. 249 C>G<br>c. 167delT | <i>DFNA3A/B1</i> | 13q11-q12           |
| <i>GJB6</i>    | NM_006783     | delD1351830<br>delD1351854                                                      | <i>DFNA3B</i>    | 13q12               |
| <i>GJB3</i>    | NM_024009.2   | c. 109 G>A                                                                      | <i>DFNA2B</i>    | 1p35.1              |
| <i>SMPX</i>    | NM_014332.2   | c. 99delC                                                                       | <i>DFNX4</i>     | Xp22                |
| <i>COCH</i>    | NM_004086.2   | c. 151 C>T                                                                      | <i>DFNA9</i>     | 14q12-q13           |
| <i>TECTA</i>   | NM_005422     | c. 26557 A>G                                                                    | <i>DFNB21</i>    | 11q                 |
| <i>TMC1</i>    | NM_138691     | c. 421C>T                                                                       | <i>DFNA36</i>    | 9q13-a21            |

**Table S2.** Coverage Statistics

| <b>Sample</b>        | <b>PID IV-1</b> | <b>PID IV-4</b> | <b>PID IV-6</b> | <b>PID IV-7</b> | <b>PID IV-12</b> | <b>PID IV-17</b> | <b>Average</b> |
|----------------------|-----------------|-----------------|-----------------|-----------------|------------------|------------------|----------------|
| <b>Total Reads</b>   | 486,564,501     | 484,712,766     | 487,129,511     | 460,365,839     | 487,377,920      | 476,685,800      | 480,472,723    |
| <b>10X</b>           | 96.34%          | 96.36%          | 96.37%          | 96.81%          | 96.87%           | 96.32%           | 96.51%         |
| <b>25X</b>           | 94.81%          | 94.78%          | 94.83%          | 91.30%          | 92.30%           | 94.73%           | 93.79%         |
| <b>50X</b>           | 27.04%          | 26.33%          | 27.44%          | 20.48%          | 30.61%           | 24.79%           | 26.10%         |
| <b>Mean Coverage</b> | 44.48           | 44.31           | 44.57           | 42.07           | 44.78            | 43.92            | 44.02          |

**Table S3. Rare variants (<1% MAF) residing within the linked 3.6 Mb region.**

| Chr       | Start            | End              | Gene                         | Variant                            | dbSNP              | Impact        | MAF (%)     |
|-----------|------------------|------------------|------------------------------|------------------------------------|--------------------|---------------|-------------|
| 13        | 98300574         | 98300575         | <i>PSMA6P4-RP11-120E13.1</i> | n.98300575G>C                      | None               | Low           | -           |
| 13        | 98300580         | 98300581         | <i>PSMA6P4-RP11-120E13.1</i> | n.98300581G>C                      | None               | Low           | -           |
| 13        | 98300584         | 98300585         | <i>PSMA6P4-RP11-120E13.1</i> | n.98300585A>C                      | None               | Low           | -           |
| 13        | 108527191        | 108527192        | <i>FAM155A-LIG4</i>          | n.108527192C>T                     | rs547032144        | Low           | 0.89        |
| 13        | 108542600        | 108542601        | <i>FAM155A-LIG4</i>          | n.108542601G>A                     | rs149383683        | Low           | 0.29        |
| 13        | 108559560        | 108559561        | <i>FAM155A-LIG4</i>          | n.108559561G>A                     | rs541712696        | Low           | -           |
| 13        | 108857507        | 108857508        | <i>LIG4</i>                  | c.*3372_*3373insTTT                | rs146739883        | Low           | -           |
| 13        | 108915581        | 108915582        | <i>TNFSF13B</i>              | n.78-6866A>G                       | rs117976973        | Low           | 0.50        |
| 13        | 109053517        | 109053518        | <i>TNFSF13B-HCFC2P1</i>      | n.109053519_109053524delACACAC     | rs143572234        | Low           | -           |
| 13        | 109076930        | 109076931        | <i>TNFSF13B-HCFC2P1</i>      | n.109076931_109076932insTCTCTCTC   | None               | Low           | -           |
| 13        | 109154792        | 109154793        | <i>HCFC2P1-MYO16</i>         | n.109154793G>A                     | rs187868150        | Low           | 0.40        |
| 13        | 109325175        | 109325176        | <i>MYO16</i>                 | c.226+6679T>C                      | rs72664976         | Low           | 0.89        |
| 13        | 109453319        | 109453320        | <i>MYO16</i>                 | c.676-5700dupA                     | rs377390365        | Low           | 0.80        |
| 13        | 109595133        | 109595134        | <i>MYO16</i>                 | c.1860-14902T>G                    | rs118168489        | Low           | 0.89        |
| 13        | 109646663        | 109646664        | <i>MYO16</i>                 | c.2376+1886_2376+1887dupCA         | rs146565717        | Low           | -           |
| 13        | 109835672        | 109835673        | <i>MYO16</i>                 | c.5349+3692A>C                     | rs187349074        | Low           | 0.70        |
| 13        | 109863191        | 109863192        | <i>MYO16</i>                 | c.*4008G>A                         | None               | Low           | -           |
| 13        | 110001293        | 110001294        | <i>LINC01067-LINC00399</i>   | n.110001294A>G                     | rs147705218        | Low           | 0.40        |
| 13        | 110183896        | 110183898        | <i>LINC00399-LINC00676</i>   | n.110183898delT                    | rs544892286        | Low           | -           |
| 13        | 110320676        | 110320680        | <i>LINC00399-LINC00676</i>   | n.110320678_110320680delTTC        | rs147586219        | Low           | -           |
| 13        | 110350350        | 110350351        | <i>LINC00399-LINC00676</i>   | n.110350351T>A                     | rs182466123        | Low           | 0.80        |
| 13        | 110492036        | 110492047        | <i>IRS2-RN7SKP10</i>         | n.110492038_110492047delCATAATATAA | None               | Low           | -           |
| <b>13</b> | <b>110826878</b> | <b>110826879</b> | <b><i>COL4A1</i></b>         | <b>c.3326-7dupT</b>                | <b>rs532261610</b> | <b>Medium</b> | <b>0.37</b> |
| 13        | 110942287        | 110942288        | <i>COL4A1</i>                | c.84+17003G>A                      | rs187157903        | Low           | 0.60        |
| 13        | 111189067        | 111189068        | <i>RAB20</i>                 | c.173-12524A>C                     | None               | Low           | -           |
| 13        | 111997038        | 111997039        | <i>TEX29</i>                 | c.*569C>T                          | None               | Low           | -           |
| 13        | 112203312        | 112203313        | <i>TEX29-RP11-65D24.2</i>    | n.112203313A>G                     | None               | Low           | -           |
| 13        | 112313508        | 112313509        | <i>RP11-65D24.2</i>          | c.170-11236C>T                     | rs551876124        | Low           | 0.15        |
| 13        | 112605700        | 112605701        | <i>AL136302.1-SNORD44</i>    | n.112605701G>T                     | rs529136683        | Low           | 0.14        |
| 13        | 112798120        | 112798121        | <i>LINC00403-LINC01070</i>   | n.112798121G>A                     | rs565231257        | Low           | 0.41        |

**Table S3. Continued**

| Chr       | Start            | End              | Gene                       | Variant                       | dbSNP       | Impact        | MAF (%)  |
|-----------|------------------|------------------|----------------------------|-------------------------------|-------------|---------------|----------|
| 13        | 112840752        | 112840753        | <i>LINC00403-LINC01070</i> | n.112840753_112840754insT     | rs562370447 | Low           | -        |
| 13        | 112883767        | 112883769        | <i>LINC01070-LINC01043</i> | n.112883769delA               | rs369608209 | Low           | -        |
| 13        | 113276405        | 113276406        | <i>TUBGCP3-C13orf35</i>    | n.113276406G>C                | None        | Low           | -        |
| 13        | 113281868        | 113281869        | <i>TUBGCP3-C13orf35</i>    | n.113281869_113281870insTGTTG | None        | Low           | -        |
| 13        | 113335353        | 113335354        | <i>C13orf35</i>            | c.259+1402G>A                 | None        | Low           | -        |
| <b>13</b> | <b>113534962</b> | <b>113534963</b> | <b><i>ATP11A</i></b>       | <b>c.*11G&gt;A</b>            | <b>None</b> | <b>Medium</b> | <b>-</b> |
| 13        | 113699222        | 113699223        | <i>MCF2L</i>               | c.450-362T>G                  | rs145185774 | Low           | 0.85     |
| 13        | 113756650        | 113756651        | <i>AL137002.1</i>          | c.-43G>A                      | None        | Low           | -        |
| 13        | 113801835        | 113801836        | <i>F10</i>                 | c.865+26C>T                   | rs183118165 | Low           | 0.35     |
| 13        | 114073963        | 114073964        | <i>ADPRHL1</i>             | c.*3173C>T                    | rs147978889 | Low           | 0.99     |
| 13        | 114075847        | 114075848        | <i>ADPRHL1</i>             | c.*1289T>C                    | rs112596428 | Low           | 0.99     |
| 13        | 114075907        | 114075908        | <i>ADPRHL1</i>             | c.*1229G>A                    | rs111450368 | Low           | 0.99     |
| 13        | 114075927        | 114075928        | <i>ADPRHL1</i>             | c.*1209A>G                    | rs186651486 | Low           | 0.99     |
| 13        | 114076021        | 114076022        | <i>ADPRHL1</i>             | c.*1115T>A                    | rs112353951 | Low           | 0.99     |
| 13        | 114076640        | 114076641        | <i>ADPRHL1</i>             | c.*496G>C                     | rs144952998 | Low           | 0.99     |
| 13        | 114088197        | 114088198        | <i>ADPRHL1</i>             | c.380-16T>G                   | rs369286904 | Low           | 0.70     |
| 13        | 114088198        | 114088199        | <i>ADPRHL1</i>             | c.380-17C>A                   | rs373227737 | Low           | 0.71     |
| 13        | 114172890        | 114172891        | <i>TMCO3</i>               | c.1226-2040G>A                | rs138992456 | Low           | 0.50     |
| 13        | 114454632        | 114454633        | <i>LINC00552-TMEM255B</i>  | n.114454633C>T                | rs142234274 | Low           | 0.50     |
| 13        | 114481059        | 114481060        | <i>TMEM255B</i>            | c.252+8927G>A                 | rs146119780 | Low           | 0.30     |
| 13        | 114638627        | 114638628        | <i>LINC00565-RASA3</i>     | n.114638628C>T                | rs113366916 | Low           | 0.40     |

**Table S4.** *In silico* predictions for *ATP11A*, chr13:113534962G>A

| <b>Allele</b>                                     | <b>Reference</b> | <b>Alternate</b> | <b>Difference</b> |
|---------------------------------------------------|------------------|------------------|-------------------|
| <b>MaxENT</b>                                     | 6.43             | 1.43             | 5                 |
| <b>Human Splice Finder</b>                        | 70.8             | 41.85            | 28.95             |
| <b>Maximum Dependence<br/>Decomposition Model</b> | 10.08            | 3.98             | 6.1               |
| <b>First-order Markov Model</b>                   | 5.09             | 1.41             | 3.68              |
| <b>Weight Matrix Model</b>                        | 7.2              | 4.03             | 3.17              |



**Table S5.** *In silico* *ATP11A* wildtype vs. mutant NNPLICE splice site predictions

| Wildtype    | <i>ATP11A</i> g.190616G>A | Sequence                           |
|-------------|---------------------------|------------------------------------|
| <b>0.97</b> | <b>0.61</b>               | <b>acgctaaGTaactgt<sup>1</sup></b> |
| 0.98        | 0.98                      | gttcacgGTgagaaa                    |
| <b>1.00</b> | <b>1.00</b>               | <b>gtcccagGTaagtaa<sup>2</sup></b> |
| 0.66        | 0.66                      | caggcagGTgtgagt                    |
| 0.41        | 0.41                      | cttgctgGTcagacc                    |
| 0.81        | 0.81                      | ggtaccgGTatggcg                    |
| 0.69        | 0.69                      | gacgaggGTgtgtcc                    |
| 0.49        | 0.49                      | gatggtaGTgagtgc                    |
| 0.51        | 0.51                      | tctgcagGTtcatcc                    |

<sup>1</sup>Donor splice site that is documented in NCBI and Ensembl. <sup>2</sup>Most probable splice site, due to *ATP11A* g.190616G>A.
